# Supplementary material for: Establishment of the First National Standard for Neutralizing Antibodies against SARS-CoV-2 XBB Variants
Source: MDPI journal article supplement (doi:10.3390/v16040554), 2024-04-01
Supplement: s1 [file s1]

Table S1. Information about donors of three candidate standards (No. 11, 22 and 33).

| Candidate standards | Sex    | Age | Region           | Severity of COVID-19 symptoms |
|---------------------|--------|-----|------------------|-------------------------------|
| 11                  | Male   | 51  | Jiangxi Province | Severe                        |
|                     | Female | 49  | Jiangxi Province | Mild                          |
|                     | Male   | 43  | Chongqing        | Severe                        |
| 22                  | Female | 58  | Jiangxi Province | Mild                          |
|                     | Male   | 46  | Hebei Province   | Mild                          |
|                     | Male   | 35  | Chongqing        | Severe                        |
| 33                  | Male   | 24  | Henan Province   | No                            |

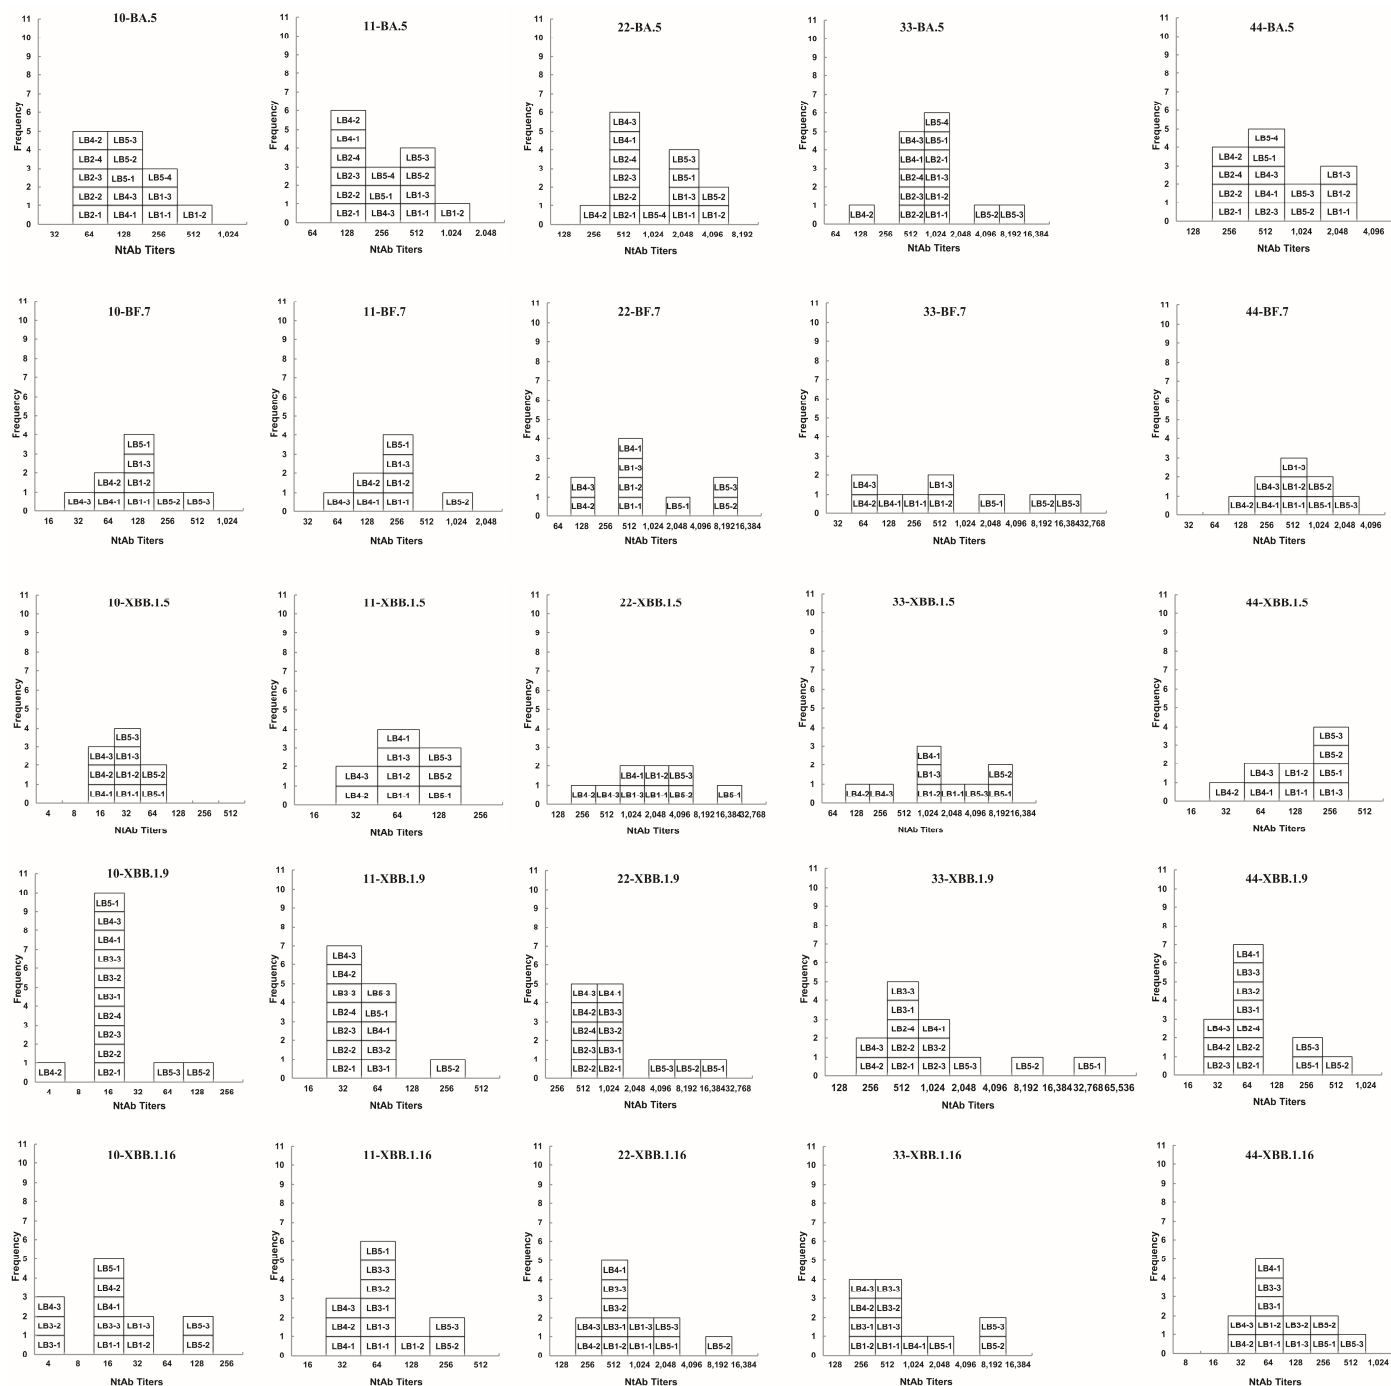

Figure S1. Histograms showing the distribution of the Neut assay endpoint titer (ID50) for four candidate standards (No.11, 22, 33 and 44) across laboratories. Each box represents the endpoint titer for each assay, labelled with the laboratory code number (LB1–5), and followed by one independent assay (1–4), indicating the assays. The Neut results using BA.5, BF.7, XBB.1.5, XBB.1.9, XBB.1.16 variants are shown row by row.

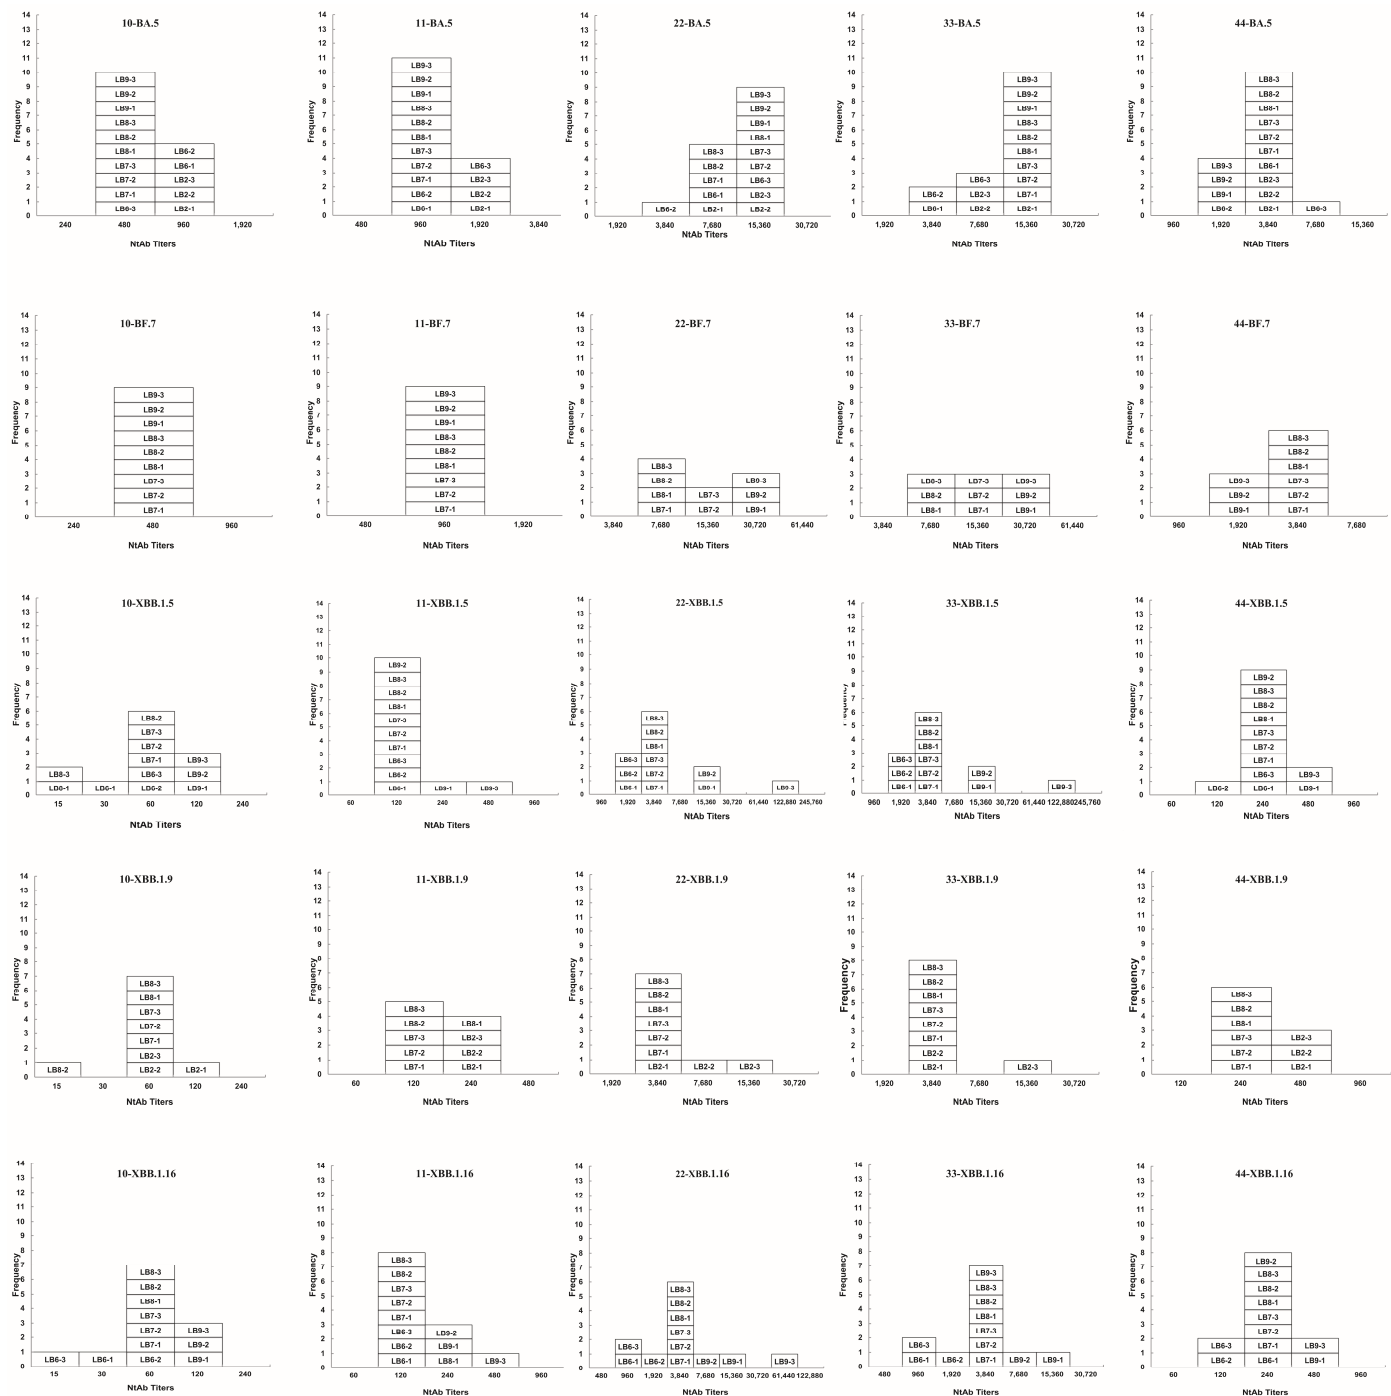

Figure S2. Histograms showing the distribution of the PsN assay endpoint titer (ID50) for four candidate standards (No.11, 22, 33 and 44) across laboratories. Each box represents the endpoint titer for each assay, labelled with the laboratory code number (LB2, 6–9), and followed by one independent assay (1–4), indicating the assays. The PsN results using BA.5, BF.7, XBB.1.5, XBB.1.9, XBB.1.16 variants are shown row by row.

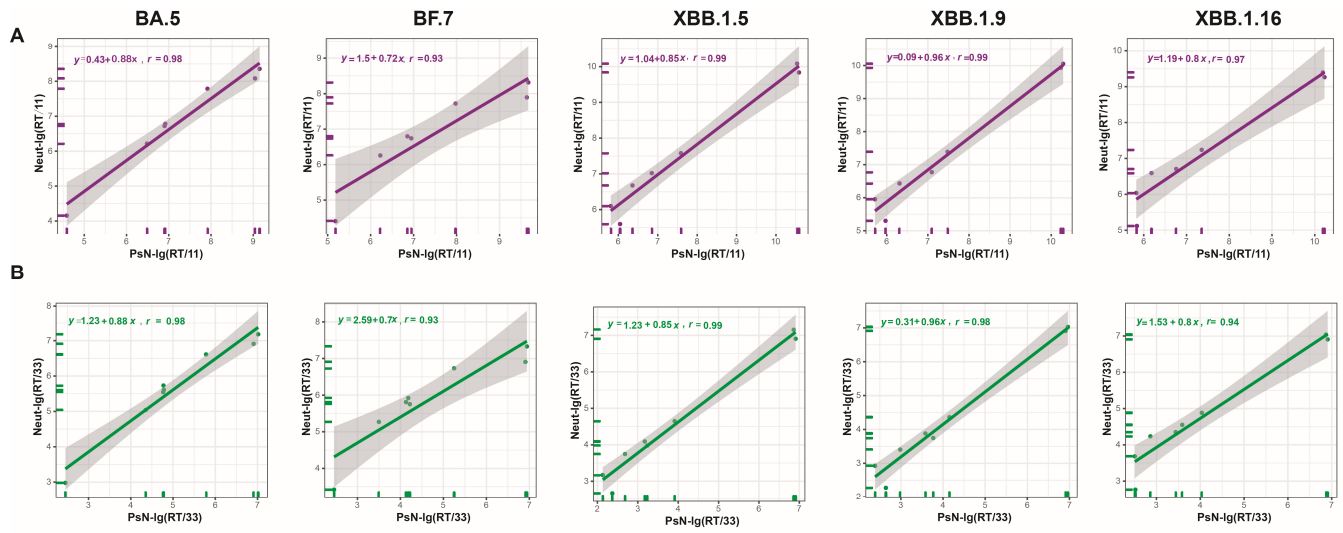

Figure S3. Correlation of RT/11 and RT/33 between the PsN and Neut methods.
